SPRING 2015 | VOLUME 13 | NUMBER 2

# Focus

The Journal of Lifelong Learning in Psychiatry

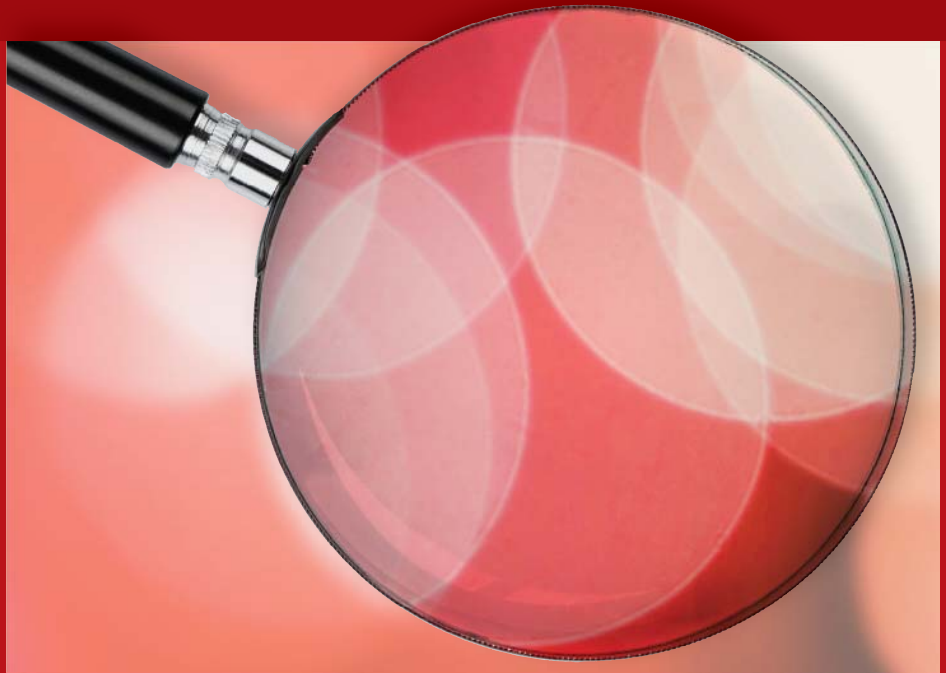

## OCD and Related Disorders: Diagnosis to Treatment

Guest Editors: Michele T. Pato, M.D., and Sean A. Sassano-Higgins, M.D.

OCD Genetics: Current and Future Directions

Cognitive-Behavioral Therapy for OCD

Hoarding Disorder: Models, Interventions, and Efficacy

Body Dysmorphic Disorder: Clinical Aspects and Relationship to OCD

A Journal of the American Psychiatric Association

[focus.psychiatryonline.org](http://focus.psychiatryonline.org)
