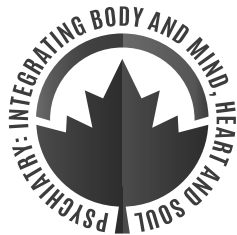

# AMERICAN PSYCHIATRIC ASSOCIATION 168<sup>TH</sup> ANNUAL MEETING

Toronto, Canada • May 16-20, 2015

Join colleagues from across the U.S. and around the world for the psychiatry event of the year!

## Why You Should Attend:

- ▶ Discover cutting-edge science and new therapies.
- ▶ Learn from renowned leaders in science and health policy.
- ▶ Connect with your peers and expand your professional network.
- ▶ Earn your annual licensure CME credit at one meeting!
- ▶ Explore the Exhibit Hall for innovative treatment options and new technologies.

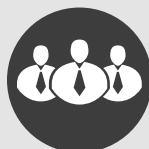

**14,000**  
Attendees

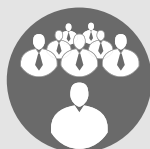

**400**  
Scientific Program  
Sessions

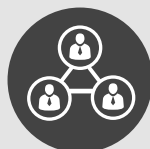

**200**  
Exhibitors

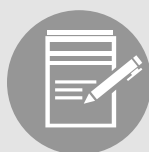

**42**  
Courses

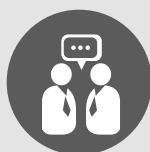

**Up to 50**  
CMEs\*

*\*The APA designates this live activity, the 168th Annual Meeting, for a maximum of 50 AMA PRA Category 1 Credits™.*

 Join: #APAAM15

To register online, visit [psychiatry.org/annualmeeting](http://psychiatry.org/annualmeeting)

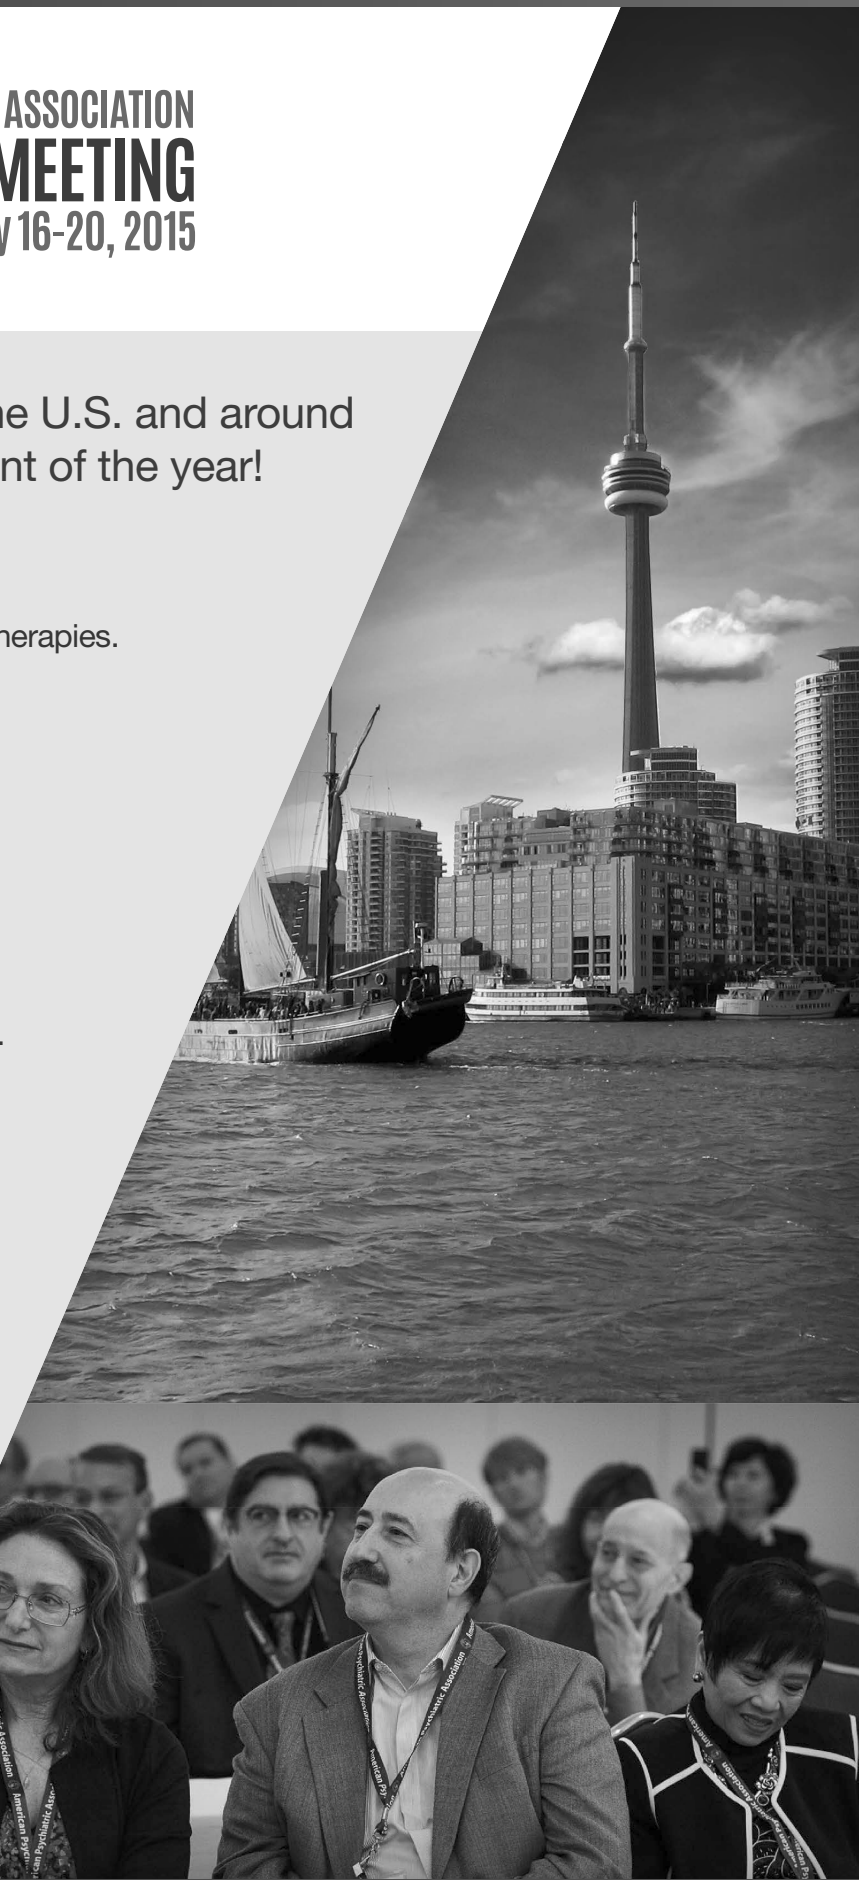



## Searching for the perfect psychiatric career? Let APA JobCentral help!

### APA JobCentral is FREE to job-seekers!

As a job-seeker you will be able to:

- Browse over 1,000 active job listings.
- Sign up for a free account and upload your resume for employers to view.
- Register for job alerts and receive immediate information when jobs are posted in a preferred location and/or specialty.

To view our site privately, please visit <http://jobs.psychiatry.org> to begin your search.

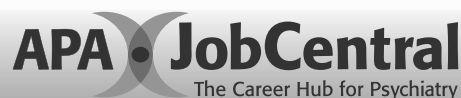

**[jobs.psychiatry.org](http://jobs.psychiatry.org)**

# Integrated Care Systems

*Psychiatric News* features highly informative content on the emerging practice model of integrated care.

Learn about:

- Predominant models of integrated care and the role psychiatrists play
- Working in integrated care settings
- Payment and delivery models
- APA resources on integrated care and delivery systems initiatives

For new psychiatrists entering the field, understanding the key role of systems of care has never been more important. Research published each month in *Psychiatric Services* will help residents play a vital role in the systems of care where they work, which is why the American Psychiatric Association provides psychiatric residents who are APA Members-in-Training full-text online access to *Psychiatric Services* content as a benefit.

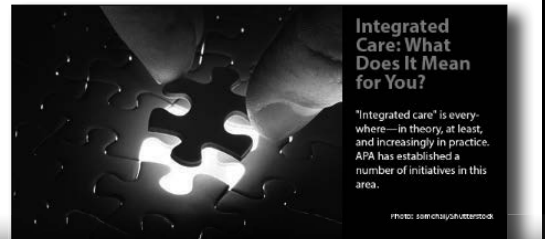

psychiatryonline DSM Library Books Journals Topics APA Guidelines CME & Self-Assessment News For Patients My POL Search Psych

## PSYCHIATRIC NEWS

From The American Psychiatric Association

  Advanced Search

About Content Archive Send Letter to the Editor Jobs/Classifieds Issue Alert Sign Up Contact Us

Home Clinical & Research Professional Government & Legal In the Community APA & Meetings From the Press

### Professional News

September 20, 2013 | DOI: 10.1176/appi.pn.2013.IC\_1

## Integrated Care: What Does It Mean for You?

Print E-mail Share Reprints

"Integrated care" is everywhere—in theory, at least, and increasingly in practice. The concept is a feature of the delivery-system improvements in the new health care reform law, and policymakers and many clinicians have converged on the idea that general medical and behavioral health services should be brought together in a patient-centered manner. Today, a small but dedicated and growing cadre of psychiatrists is advancing the cause of integrated care and the participation of psychiatrists in collaborative-care models.

Integrated care "is the right thing to do to improve the care and quality of life for people we take care of."

APA has established a number of initiatives in this area, headed up by the Work Group on Integrated Care of the Council on Healthcare Systems and Financing, chaired by Lori Raney, M.D., medical director of Axis Health System in Durango, Colo., and the Board of Trustees Health Care Reform Strategic Action Work Group, chaired by Howard Goldman, M.D., director of the Network on Mental Health Policy Research (funded by the MacArthur Foundation) and editor of the APA journal *Psychiatric Services*. Work group members include Jürgen Unützer, M.D., who is director of the Center for Advancing Integrated Mental Health Solutions (AIMS) at the University of Washington and one of the pioneers of integration. Along with Wayne Katon, M.D., Unützer began developing models in integrating mental health and primary care and testing them in diverse primary care settings across the country. Previously working on these issues was the APA Board of Directors' Work Group on Psychiatry and Healthcare Reform, chaired by Paul Summergrad, M.D., past-president and chair of psychiatry at Tufts University.

Integrated care system is a new opportunity for psychiatrists—another option on which they can use their license to care for people—but it is not a requirement, and it is not a new specialty. Moreover, psychiatrists can work part time in an integrated care system, maintaining whatever kind of traditional inpatient or outpatient practice they wish (see question 6). There are degrees of integrated care ranging from the original model of general medical and mental health services are offered in the same location; to a model of integrated care—where a psychiatrist working in consultation with other specialists to manage the behavioral health of a defined population of patients is sometimes referred to as "collaborative care," and the two terms—collaborative care—are often used interchangeably. However, for the purposes of this newsletter, the term "integrated care" will be used.

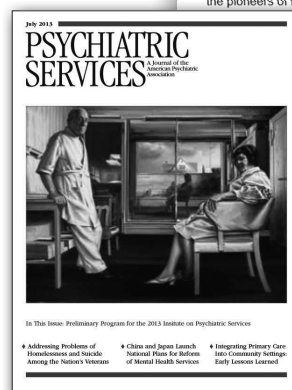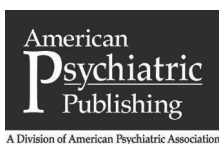

psychnews.psychiatryonline.org

www.appi.org • 1-800-368-5777 • Email: appi@psych.org

Priority Code AH1329

The end of your psychiatric residency is coming up—  
are you ready to land that perfect job?

Are you a 3rd year resident who wants to get  
started early?

# Let APA JobCentral help!

**APA JobCentral**, the job board for the American Psychiatric Association can help you ready yourself for the most important search of your career—that FIRST job. Whether it be a group practice, private practice, or hospital-based work environment you seek, JobCentral has over 1,200 open positions. You can search our jobs by location, position type, keyword, and work setting.

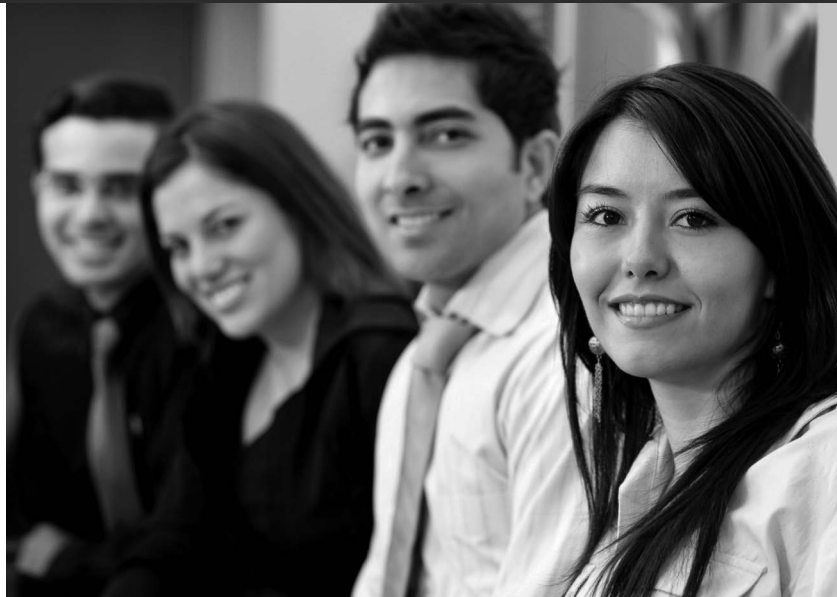

## How do I get started?

Simply visit [Jobs.psychiatry.org](http://Jobs.psychiatry.org) and take control of your future.

## Registration is free.

With a job-seeker account you can create a career profile, upload your resume, and search particular employers' open positions. If you are planning on attending the 2013 APA Annual Meeting, you will have the ability to flag your resume for meeting attendees to view. On-site interviews can be arranged.

## Have a specific location/specialty you're searching for?

Set up a job alert and be notified immediately when a position is posted with your desired criteria.

## Keep your resume on top of the others!

Use our free resume upgrade code **FREERES100**, while logged into your job-seeker profile to push your resume to the top of the screen.

## For more information please contact:

Eamon Wood • 212-904-0363 • [Ewood@pminy.com](mailto:Ewood@pminy.com)

**APA JobCentral**  
The Career Hub for Psychiatry

American  
Psychiatric  
Publishing  
A Division of American Psychiatric Association

AH1305

# The Gravity of Weight

## A Clinical Guide to Weight Loss and Maintenance

Sylvia R. Karasu, M.D., and T. Byram Karasu, M.D.

Foreword by Albert J. Stunkard, M.D.

**T**he *Gravity of Weight: A Clinical Guide to Weight Loss and Maintenance*, is a scholarly and critical inquiry into the field of overweight and obesity. Reviewing more than 900 publications, from some of the early classical papers to the most recent research, the authors have integrated the complex psychological and physiological aspects of the mind, brain, and body to explain why the control of body weight is so daunting for so many people.

Written primarily for clinicians in all health-related fields, including physicians, psychologists, nurses, social workers, and nutritionists, as well as for their intellectually curious patients,

*The Gravity of Weight* explores the controversy regarding obesity as a disease with morbidity and mortality, as well as the complex methodological issues involved in obesity research. The authors delineate the extraordinary metabolic complexities implicated in weight control as well as the importance of circadian rhythms and sleep as they relate to weight and even disorders such as the night eating syndrome. They also investigate the psychological aspects of overweight and obesity, including discrimination against the obese and the fat acceptance movement, and they discuss some of the most common diets as well as the psychotherapeutic, pharmacological, and surgical treatment options currently available for these patients.

Drs. Karasu have drawn from both professional and personal experience to write *The Gravity of Weight: A Clinical Guide To Weight Loss and Maintenance*. Both had fathers who suffered from morbid obesity. One died at the age of 56, while the other lived to be 91. The authors' professional curiosity led them to question how differences in environment, genetics, and overall physical and psychological health can affect one person's longevity and another's early passing.

In searching for the answers to some of the most perplexing questions regarding weight, the authors have created what is perhaps the most comprehensive exploration of the relationship of the mind, brain, body and our environment to overweight and obesity. The resulting text deserves a prominent place in the library of those who work in this field.

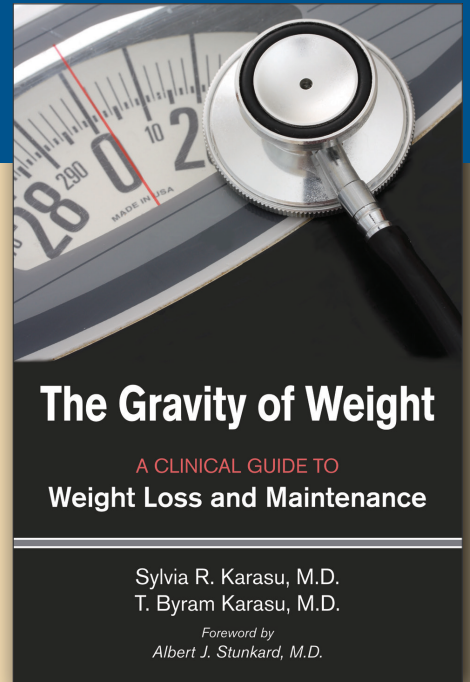

2010 • 518 pages • ISBN 978-1-58562-360-0 • Paperback • \$66.00 • Item #62360

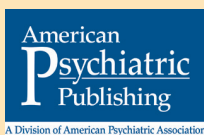

Order Online: [www.appi.org](http://www.appi.org)

American Psychiatric Publishing  
A Division of American Psychiatric Association

Phone: 703-907-7322 • Toll Free: 1-800-368-5777

Email: [appi@psych.org](mailto:appi@psych.org)

**20% Discount for American Psychiatric Association Members!**

**25% Discount for APA Resident-Fellow Members**
